# Supplementary material for: The Neural Multilineage Differentiation Capacity of Human Neural Precursors from the Umbilical Cord—Ready to Bench for Clinical Trials
Source: MDPI journal article supplement (doi:10.3390/membranes12090873), 2022-09-09
Supplement: s1 [file s1]

# Supplementary Material

| Marker | Fluorochrome | Clone    | Manufacturer | Description                                                                                                                                                                                      |
|--------|--------------|----------|--------------|--------------------------------------------------------------------------------------------------------------------------------------------------------------------------------------------------|
| CD45   | FITC         | J33      | BD®          | It is a membrane protein in lymphocytes and absents in erythrocytes and platelets.                                                                                                               |
| CD34   | APC          | 581      | BD®          | It is a transmembrane glycoprotein expressed in hematopoietic progenitor cells, vascular endothelium, and some fibroblasts.                                                                      |
| CD271  | PE           | C40-1457 | BD®          | It is a transmembrane protein found in neuronal axons, Schwann cells, and perineural cells of peripheral nerves. This marker can be found in some epithelial, mesenchymal, and lymphoid tissues. |
| CD105  | PE           | 266      | BD®          | It is a membrane protein found in vascular endothelial cells, activated macrophages, and MSC.                                                                                                    |
| CD73   | FITC         | AD2      | BD®          | Marker expressed in MSC with enzymatic activity and catalyzes the dephosphorylation of adenosine monophosphate (AMP), converting it to adenosine.                                                |
| CD29   | PE           | MAR4     | BD®          | CD29 is expressed on lymphocytes, monocytes, and granulocytes. It is involved in a variety of cell-cell and cell-matrix interactions.                                                            |
| CD90   | APC          | 5E10     | BD®          | It is a protein highly expressed in cells capable of being cultured in the long term; therefore, it implies the function of cell-cell adhesion and cell-matrix.                                  |

Table S1. Markers of flow cytometry.

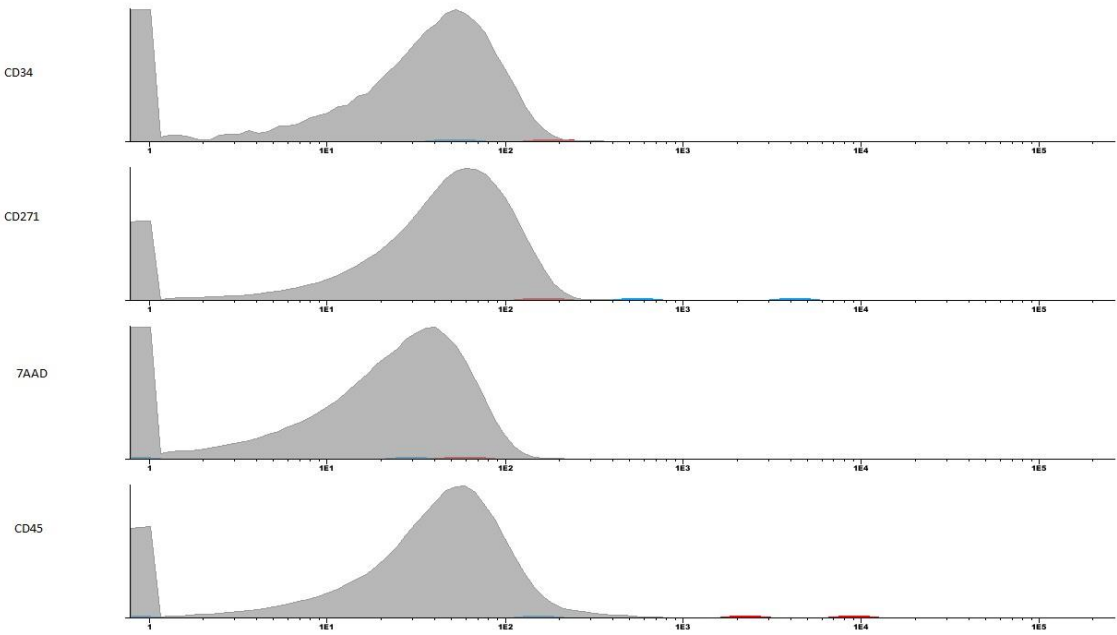

**Figure S1.** Histogram of the markers CD34, CD271, 7AAD, and CD45 - WJMSC.

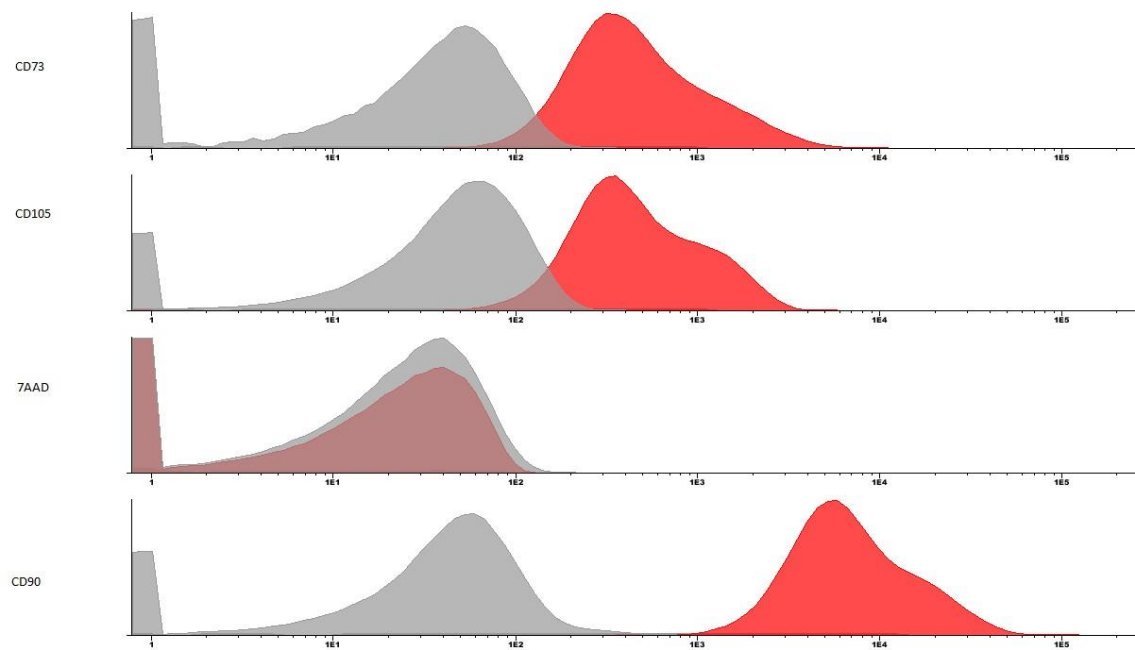

**Figure S2.** Histogram of the markers CD73, CD105, 7AAD, and CD90 - WJMSC.

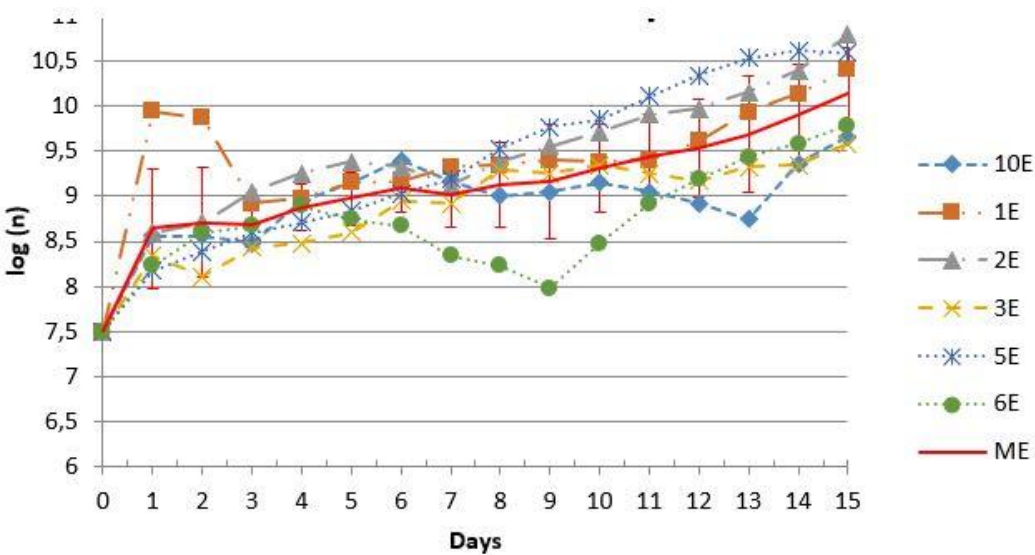

**Figure S3.** Cell growth kinetics of WJMSC. Note: 1E, 2E, 3E, 5E, 6E, and 10E are the 6 analyzed samples and the samples mean (ME).

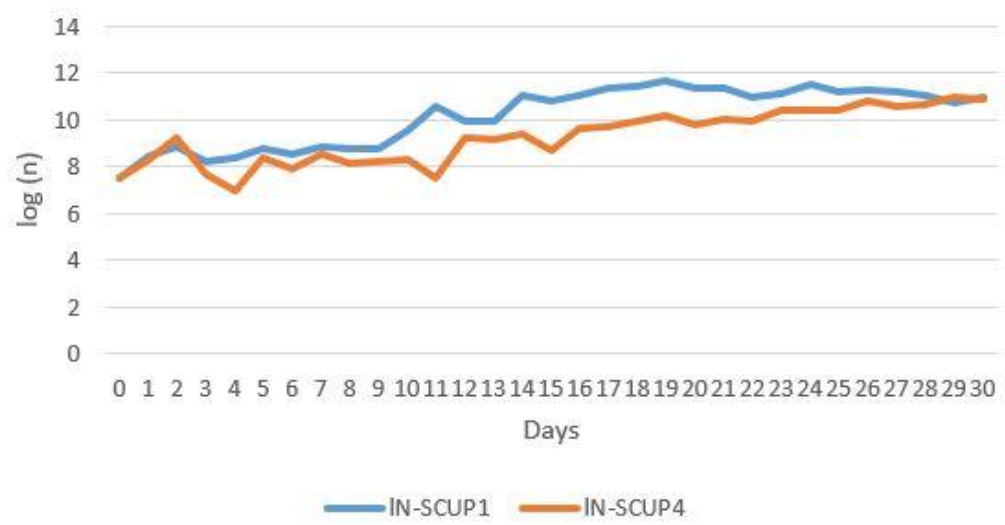

**Figure S4.** Cell growth kinetics of UCBMSC. Note: IN-SCUP1 and IN-SCUP4 are the 2 analyzed samples.

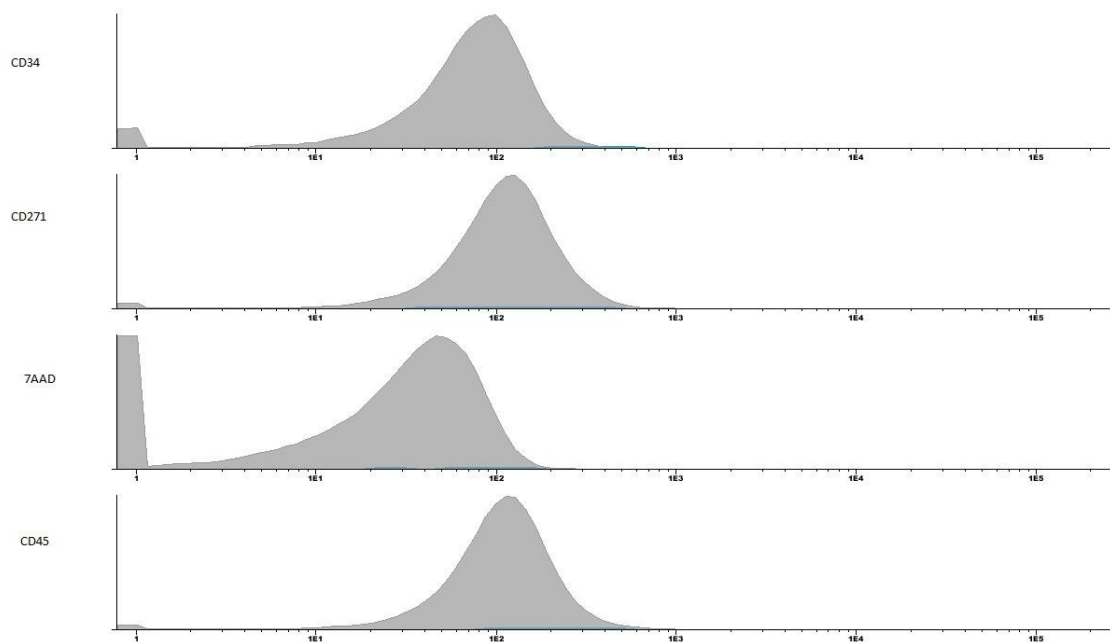

**Figure S5.** Histogram of the markers CD34, CD271, 7AAD, and CD45 – neural precursors.

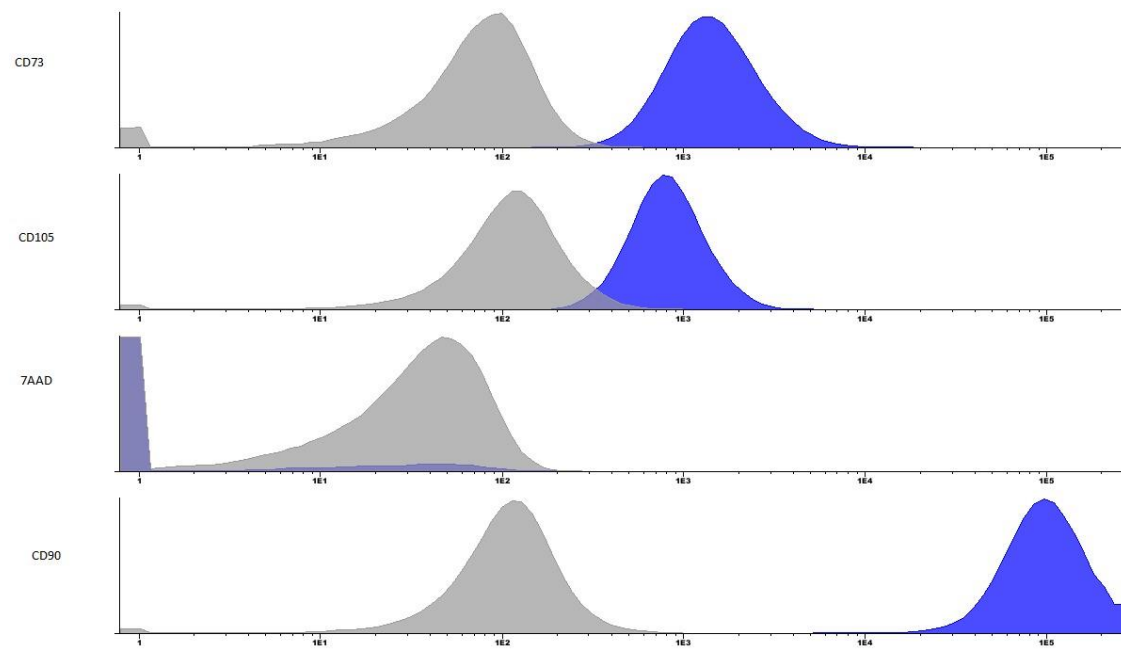

**Figure S6.** Histogram of the markers CD73, CD105, 7AAD, and CD90 – neural precursors.
